# Supplementary material for: Phosphate ions improve the performance of BiFeO3 piezoelectric photoelectrochemical water splitting
Source: Royal Society of Chemistry journal article supplement (doi:10.1039/d3nj02733c), 2023-12-02
Supplement: d3nj02733c1.pdf [file d3nj02733c1.pdf]

## Electronic Supplemental Information

Fig. S1 LSV curves of BiFeO<sub>3</sub>, P-BiFeO<sub>3</sub> photoanodes measured in 0.2 M Na<sub>2</sub>SO<sub>4</sub> electrolyte solution with the addition of 0.1 M Na<sub>2</sub>SO<sub>3</sub>

Fig. S2 LSV curves of BiFeO<sub>3</sub>, P-BiFeO<sub>3</sub> photoanodes measured in 0.2 M Na<sub>2</sub>SO<sub>4</sub> electrolyte solution with the addition of 0.1 M Na<sub>2</sub>SO<sub>3</sub> under 90 kHz ultrasonic vibration

Fig. S3 Hydrogen evolution curve measured under AM 1.5G continuous illumination

Fig. S4 EDS elemental mapping diagram of P-BiFeO<sub>3</sub>

Fig. S5 CV of BiFeO<sub>3</sub> (a) and P-BiFeO<sub>3</sub>(b) photoanodes performed at different scan rates; Charging current density differences of BiFeO<sub>3</sub> and P-BiFeO<sub>3</sub> (c) photoanodes plotted against scan rates

Tab. S1 The flat band potential ( $V_{FB}$ ) and carrier density ( $N_d$ ) of BiFeO<sub>3</sub> and P-BiFeO<sub>3</sub> photoanodes with different conditions

Tab. S2 The fitted parameters extracted from Nyquist plots of BiFeO<sub>3</sub> and P-BiFeO<sub>3</sub> photoanodes with different conditions

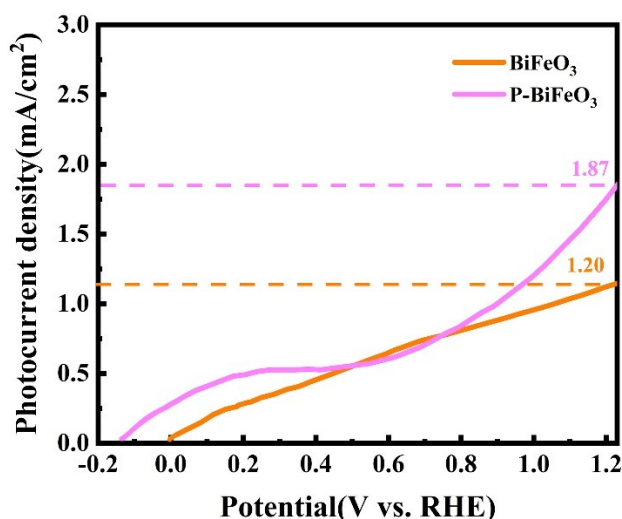

Fig. S1 LSV curves of BiFeO<sub>3</sub>, P-BiFeO<sub>3</sub> photoanodes measured in 0.2 M Na<sub>2</sub>SO<sub>4</sub> electrolyte solution with the addition of 0.1 M Na<sub>2</sub>SO<sub>3</sub>

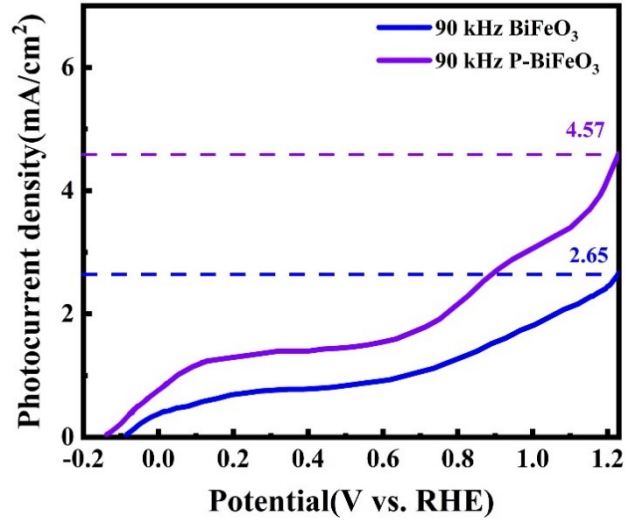

Fig. S2 LSV curves of BiFeO<sub>3</sub>, P-BiFeO<sub>3</sub> photoanodes measured in 0.2 M Na<sub>2</sub>SO<sub>4</sub> electrolyte solution with the addition of 0.1 M Na<sub>2</sub>SO<sub>3</sub> under 90 kHz ultrasonic vibration

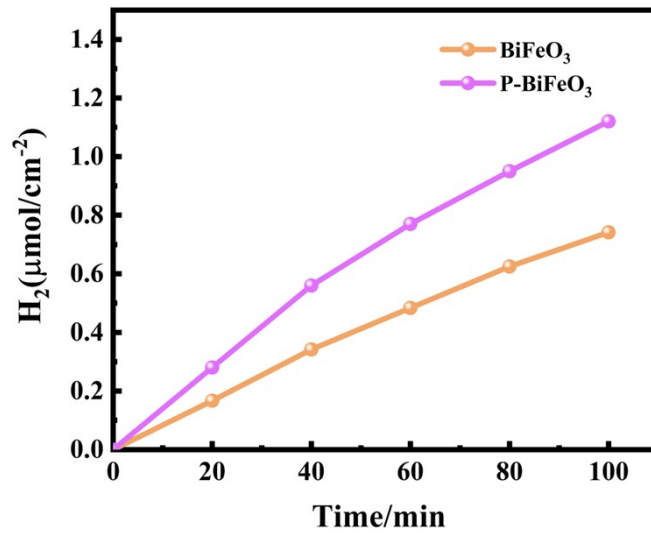

Fig. S3 Hydrogen evolution curve measured under AM 1.5G continuous illumination

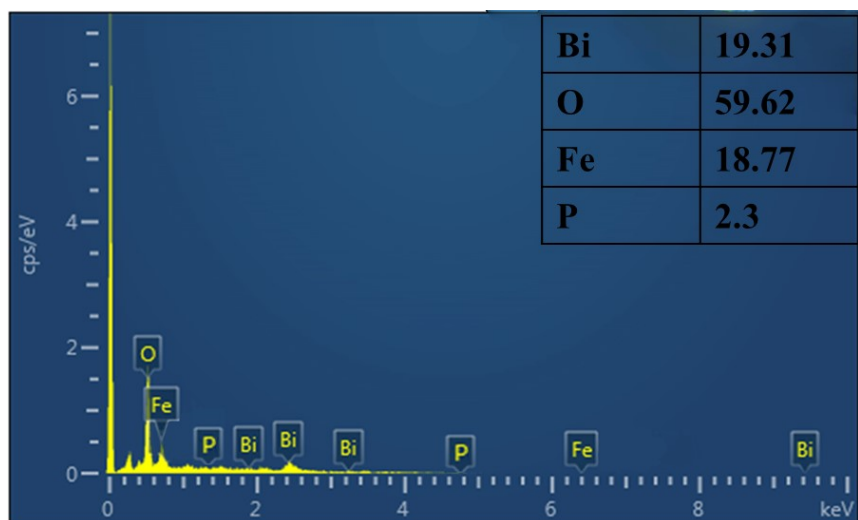

Fig. S4 EDS elemental mapping diagram of P-BiFeO<sub>3</sub>

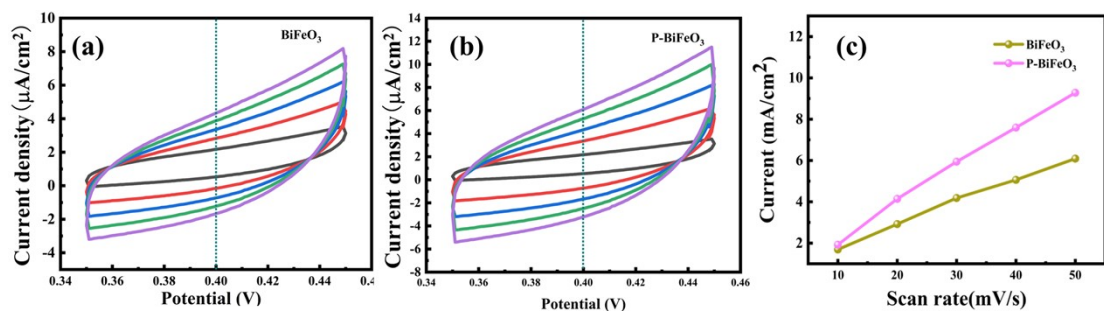

Fig. S5 CV of BiFeO<sub>3</sub> (a) and P-BiFeO<sub>3</sub>(b) photoanodes performed at different scan rates; Charging current density differences of BiFeO<sub>3</sub> and P-BiFeO<sub>3</sub> (c) photoanodes plotted against scan rates

Tab. S1 The flat band potential ( $V_{FB}$ ) and carrier density ( $N_d$ ) of BiFeO<sub>3</sub> and P-BiFeO<sub>3</sub> photoanodes with different conditions

| <b>Samples</b>                                            | <b><math>V_{FB}</math> (V vs RHE)</b> | <b><math>N_d</math> (cm<sup>-3</sup>)</b> |
|-----------------------------------------------------------|---------------------------------------|-------------------------------------------|
| BiFeO <sub>3</sub>                                        | 0.57                                  | $3.5 \times 10^{13}$                      |
| P-BiFeO <sub>3</sub>                                      | 0.55                                  | $4.2 \times 10^{13}$                      |
| BiFeO <sub>3</sub> under 90 kHz<br>ultrasonic vibration   | 0.47                                  | $3.7 \times 10^{14}$                      |
| P-BiFeO <sub>3</sub> under 90 kHz<br>ultrasonic vibration | 0.43                                  | $1.9 \times 10^{15}$                      |

Tab. S2 The fitted parameters extracted from Nyquist plots of BiFeO<sub>3</sub> and P-BiFeO<sub>3</sub> photoanodes with different conditions

| <b>Samples</b>                                            | <b>R<sub>1</sub> (Ω cm<sup>2</sup>)</b> | <b>R<sub>2</sub> (Ω cm<sup>2</sup>)</b> | <b>W<sub>1</sub>(Ω cm<sup>2</sup>)</b> | <b>CPE(F/cm<sup>2</sup>)</b> |
|-----------------------------------------------------------|-----------------------------------------|-----------------------------------------|----------------------------------------|------------------------------|
| BiFeO <sub>3</sub>                                        | 30.24                                   | 2275                                    | 0.36970                                | 0.89574                      |
| P-BiFeO <sub>3</sub>                                      | 28.26                                   | 2232                                    | 0.59625                                | 0.87823                      |
| BiFeO <sub>3</sub> under 90 kHz<br>ultrasonic vibration   | 17.76                                   | 478                                     | 0.33245                                | 0.81254                      |
| P-BiFeO <sub>3</sub> under 90 kHz<br>ultrasonic vibration | 14.12                                   | 402                                     | 0.21351                                | 0.89325                      |
